# Supplementary material
Source: MDPI journal article supplement (https://www.mdpi.com/2073-4344/12/8/845)
Supplement: s1 [file s1]

## Supplementary Materials

**Table S1.** Summary of N-doped CNT and proposed mechanistical pathway.

| Carbocatalyst | Pollutant   | N-doping (%) | O-Functional Groups | Key active sites for Radical and Non-Radical Pathway                                                                                                                          |      |
|---------------|-------------|--------------|---------------------|-------------------------------------------------------------------------------------------------------------------------------------------------------------------------------|------|
|               |             |              |                     | Radical pathway<br>- $\text{SO}_4^{\bullet-}$ , $\bullet\text{OH}$<br>-C=O more active site                                                                                   |      |
| N-SWCNT       | Phenol      | 0.80         | 1.15                | Non-radical Pathway<br>- Electron-transfer reaction from N dopants to PMS<br>- graphitic N act as effective active site                                                       | [33] |
|               |             |              |                     | Non-radical – electron-transfer regime via NCNT-PMS* complex                                                                                                                  |      |
| N-CNT         | Phenol      | 1.51-7.34    | --                  | Graphitic N act as primary catalytic site for PMS activation                                                                                                                  | [34] |
|               |             |              |                     | Pyridinic N and Pyrrolic N dopants are much more active sites than O-functional groups                                                                                        |      |
| N-MWCNT       | Phenol      | 0.88         | 3.30                | CNT-C=O and CNT-C=N can transfer $e^-$ to PMS for producing $\text{SO}_4^{\bullet-}$ and $\bullet\text{OH}$                                                                   | [35] |
| N-SWCNT       | Phenol      | 0.80         | 1.15                | PMS activation by N-SWCNT contributes non-radical pathway                                                                                                                     | [36] |
|               |             |              |                     | Radical pathway<br>- $\text{SO}_4^{\bullet-}$ , $\bullet\text{OH}$ , $\text{O}_2^{\bullet-}$                                                                                  |      |
| FeC@NCNT      | Phenol      | 1.82         | --                  | Non-radical Pathway<br>$^1\text{O}_2$                                                                                                                                         | [37] |
|               |             |              |                     | Non-radical ( $^1\text{O}_2$ ) process is dominants BPA degradation and - $\text{SO}_4^{\bullet-}$ , $\bullet\text{OH}$ and $\text{O}_2^{\bullet-}$ only play auxiliary roles |      |
| N-CNT         | Bisphenol A | --           | --                  |                                                                                                                                                                               | [57] |

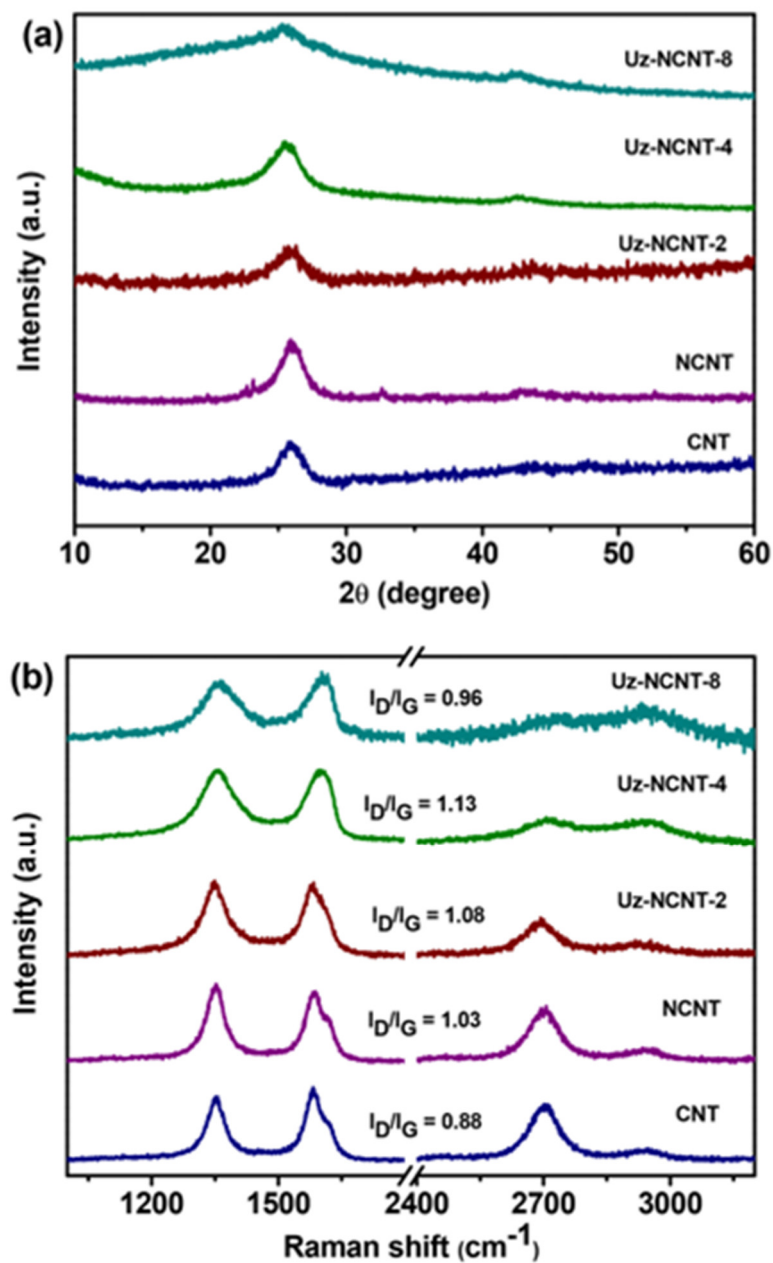

Figure S1. (a) XRD patterns and (b) Raman spectrum of CNT, NCNT and unzipped NCNTs.

Table S2. Details of Raman spectra and  $I_D/I_G$  ratio.

| Carbocatalysts | D band | $I_D$ | G band | $I_G$ | 2D band | $I_D/I_G$ | Number of Graphene Layer |
|----------------|--------|-------|--------|-------|---------|-----------|--------------------------|
| CNT            | 1351   | 947   | 1585   | 1080  | 2703    | 0.8768    | multi-layer              |
| NCNT           | 1351   | 1037  | 1585   | 1006  | 2716    | 1.0303    | multi-layer              |
| Uz-NCNT-2      | 1347   | 956   | 1591   | 880   | 2698    | 1.0863    | multi-layer              |
| Uz-NCNT-4      | 1353   | 2837  | 1612   | 2508  | 2712    | 1.1311    | multi-layer              |
| Uz-NCNT-8      | 1359   | 1108  | 1608   | 1118  | 2732    | 0.9606    | multi-layer              |

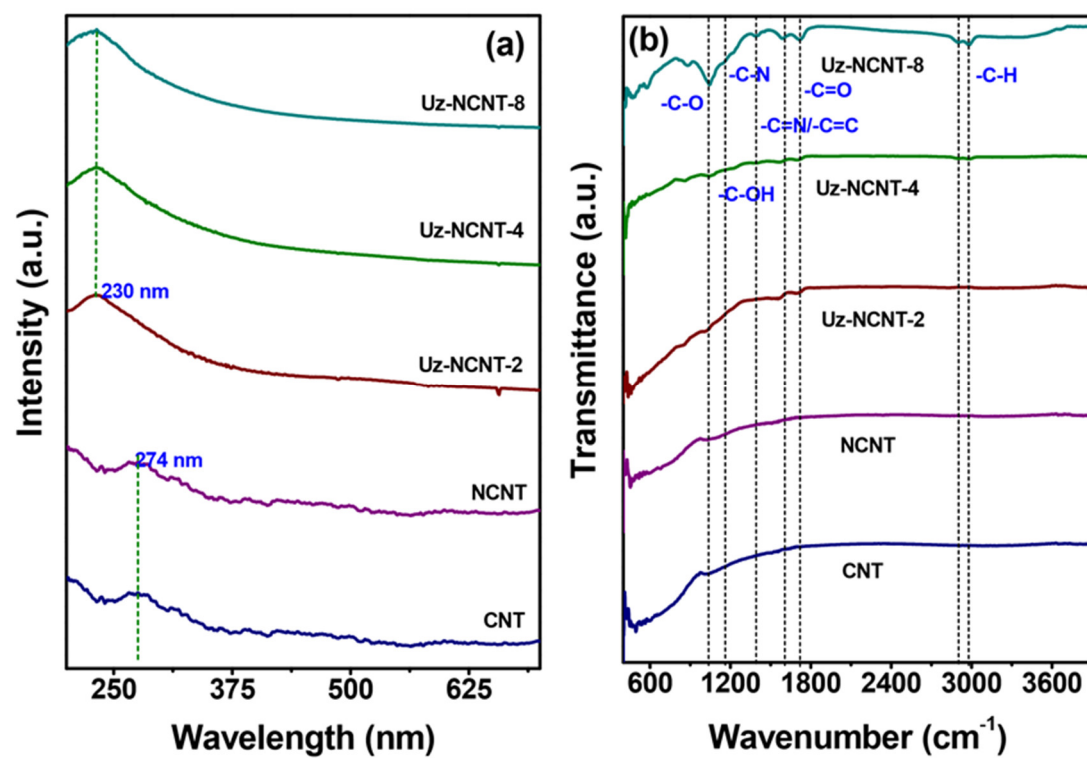

Figure S2. (a) UV-visible spectrum and (b) FT-IR spectrum of CNT, NCNT and unzipped NCNTs.

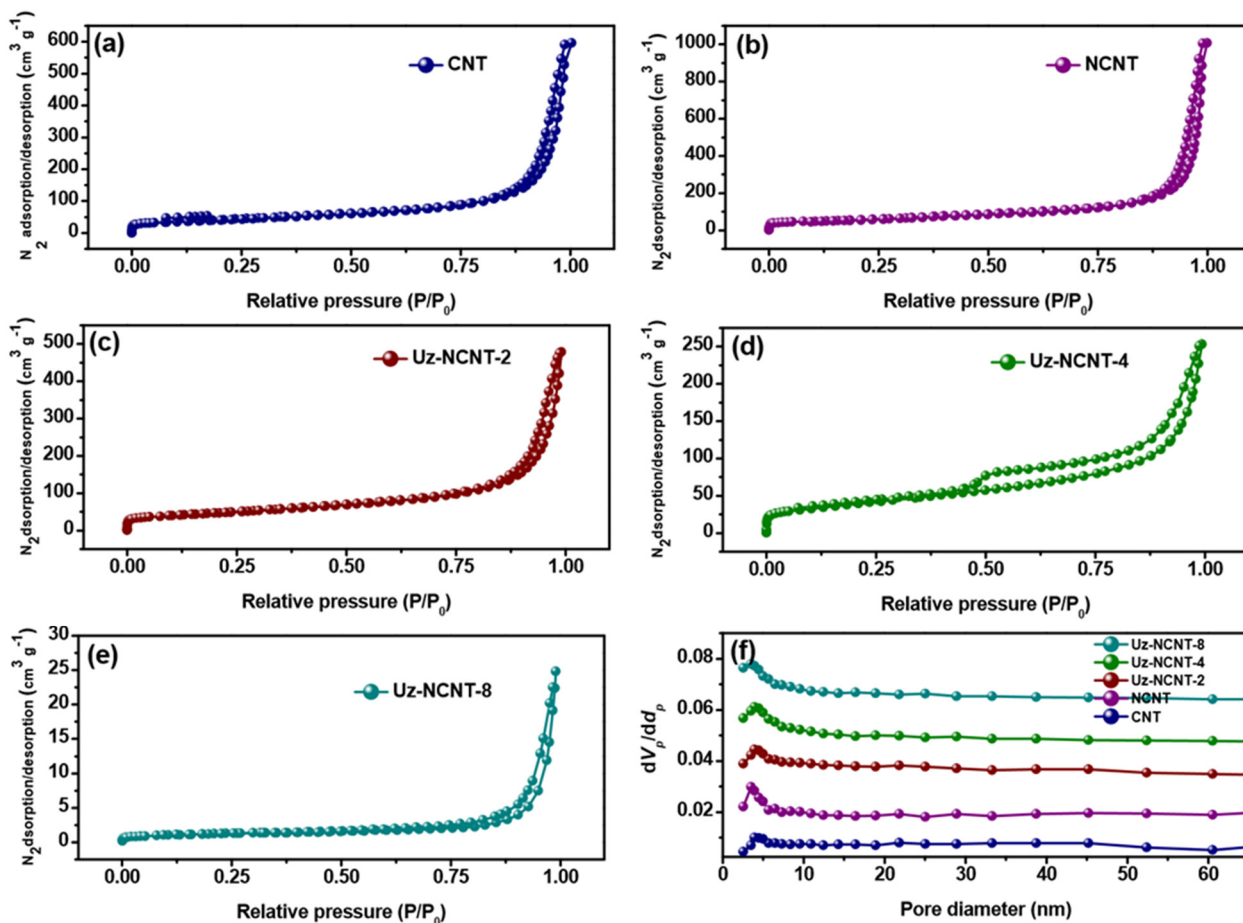

**Figure S3.** BET N<sub>2</sub> adsorption/desorption profile of (a) CNT, (b) NCNT, (c) Uz-NCNT-2, (d) Uz-NCNT-4, (e) Uz-NCNT-8 and (f) BJH pore diameter.

**Table S3.** BET surface area and BJH pore diameter of derived carbocatalysts.

| Carbocatalyst | Specific Surface area (m <sup>2</sup> g <sup>-1</sup> ) | Total Pore Volume (cm <sup>3</sup> g <sup>-1</sup> ) | Average Pore Diameter (nm) |
|---------------|---------------------------------------------------------|------------------------------------------------------|----------------------------|
| CNT           | 206.41                                                  | 1.455                                                | 26.607                     |
| N-MWCNT       | 207.06                                                  | 1.4043                                               | 27.79                      |
| Uz-NCNT-2     | 163.04                                                  | 0.752                                                | 17.604                     |
| Uz-NCNT-4     | 140.72                                                  | 0.373                                                | 10.603                     |
| Uz-NCNT-8     | 4.4125                                                  | 0.03839                                              | 34.801                     |

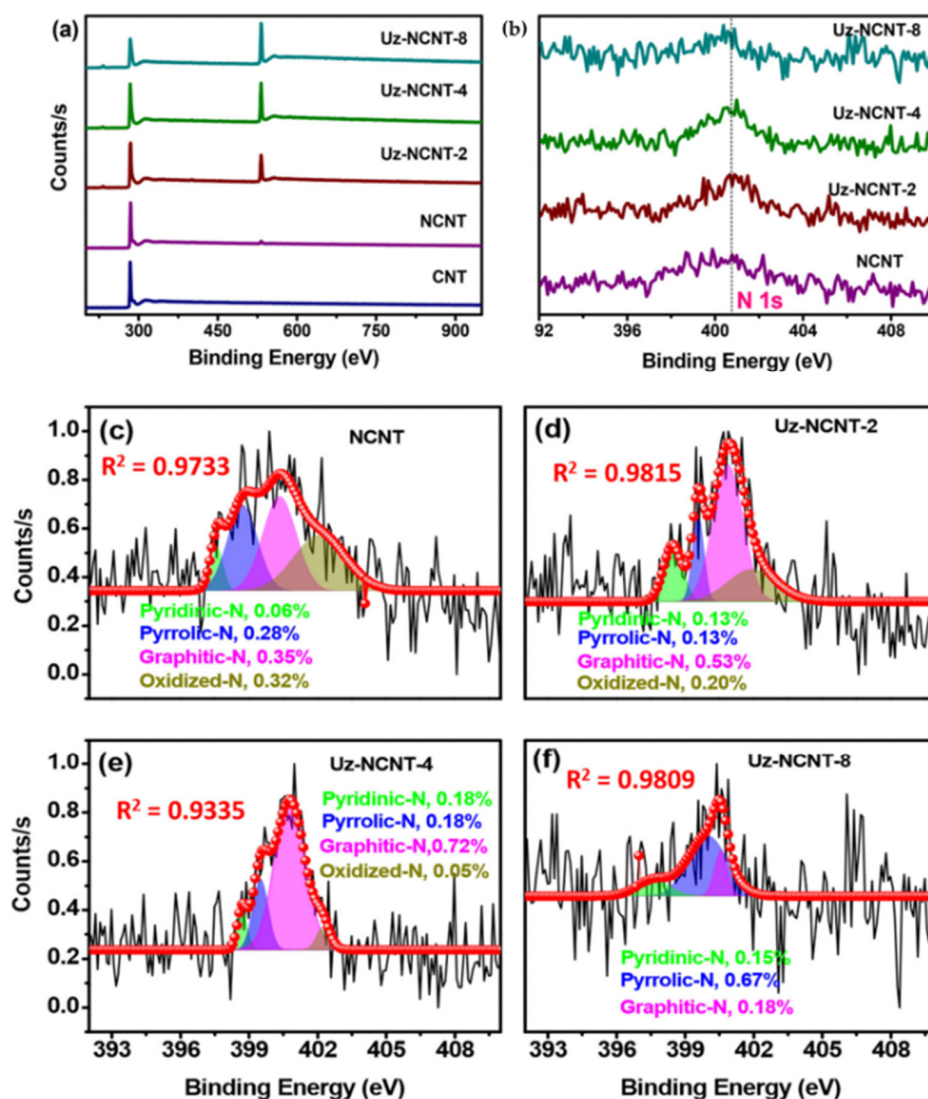

Figure S4. (a) XPS survey spectrum, (b) N 1s core-level spectra, deconvoluted N 1s core-level spectra of (c) NCNT, (d) Uz-NCNT-2, (e) Uz-NCNT-4 and (f) Uz-NCNT-8.

**Table S4.** Atomic percentage of N-dopants in carbocatalysts was determined from N 1s spectra.

| N-dopants         | Area         | Peak Center (eV) | Width | Height | Fraction (at.%) |
|-------------------|--------------|------------------|-------|--------|-----------------|
| NCNT              |              |                  |       |        |                 |
| Pyridinic N       | 0.124        | 397.604          | 0.541 | 0.182  | 0.058           |
| Pyrrolic N        | 0.594        | 398.714          | 1.331 | 0.356  | 0.281           |
| Substitutional N  | 0.732        | 400.333          | 1.491 | 0.392  | 0.346           |
| Oxidized N        | 0.667        | 402.088          | 2.299 | 0.231  | 0.315           |
| <b>Total area</b> | <b>2.116</b> |                  |       |        | 1.000           |
| Uz-NCNT-2         |              |                  |       |        |                 |
| Pyridinic N       | 0.238        | 398.465          | 0.813 | 0.234  | 0.133           |
| Pyrrolic N        | 0.229        | 399.566          | 0.504 | 0.363  | 0.128           |
| Substitutional N  | 0.952        | 400.873          | 1.339 | 0.568  | 0.533           |
| Oxidized N        | 0.366        | 401.930          | 2.163 | 0.135  | 0.205           |
| <b>Total area</b> | <b>1.785</b> |                  |       |        | 1.000           |
| Uz-NCNT-4         |              |                  |       |        |                 |
| Pyridinic N       | 0.085        | 398.696          | 0.408 | 0.166  | 0.059           |
| Pyrrolic N        | 0.254        | 399.498          | 0.684 | 0.296  | 0.175           |
| Substitutional N  | 1.035        | 400.789          | 1.337 | 0.618  | 0.716           |
| Oxidized N        | 0.073        | 402.235          | 0.607 | 0.095  | 0.050           |
| <b>Total area</b> | <b>1.446</b> |                  |       |        | 1.000           |
| Uz-NCNT-8         |              |                  |       |        |                 |
| Pyridinic N       | 0.123        | 397.629          | 1.463 | 0.067  | 0.153           |
| Pyrrolic N        | 0.538        | 399.989          | 1.718 | 0.250  | 0.671           |
| Substitutional N  | 0.142        | 400.564          | 0.590 | 0.192  | 0.176           |
| <b>Total area</b> | <b>0.803</b> |                  |       |        | 1.000           |

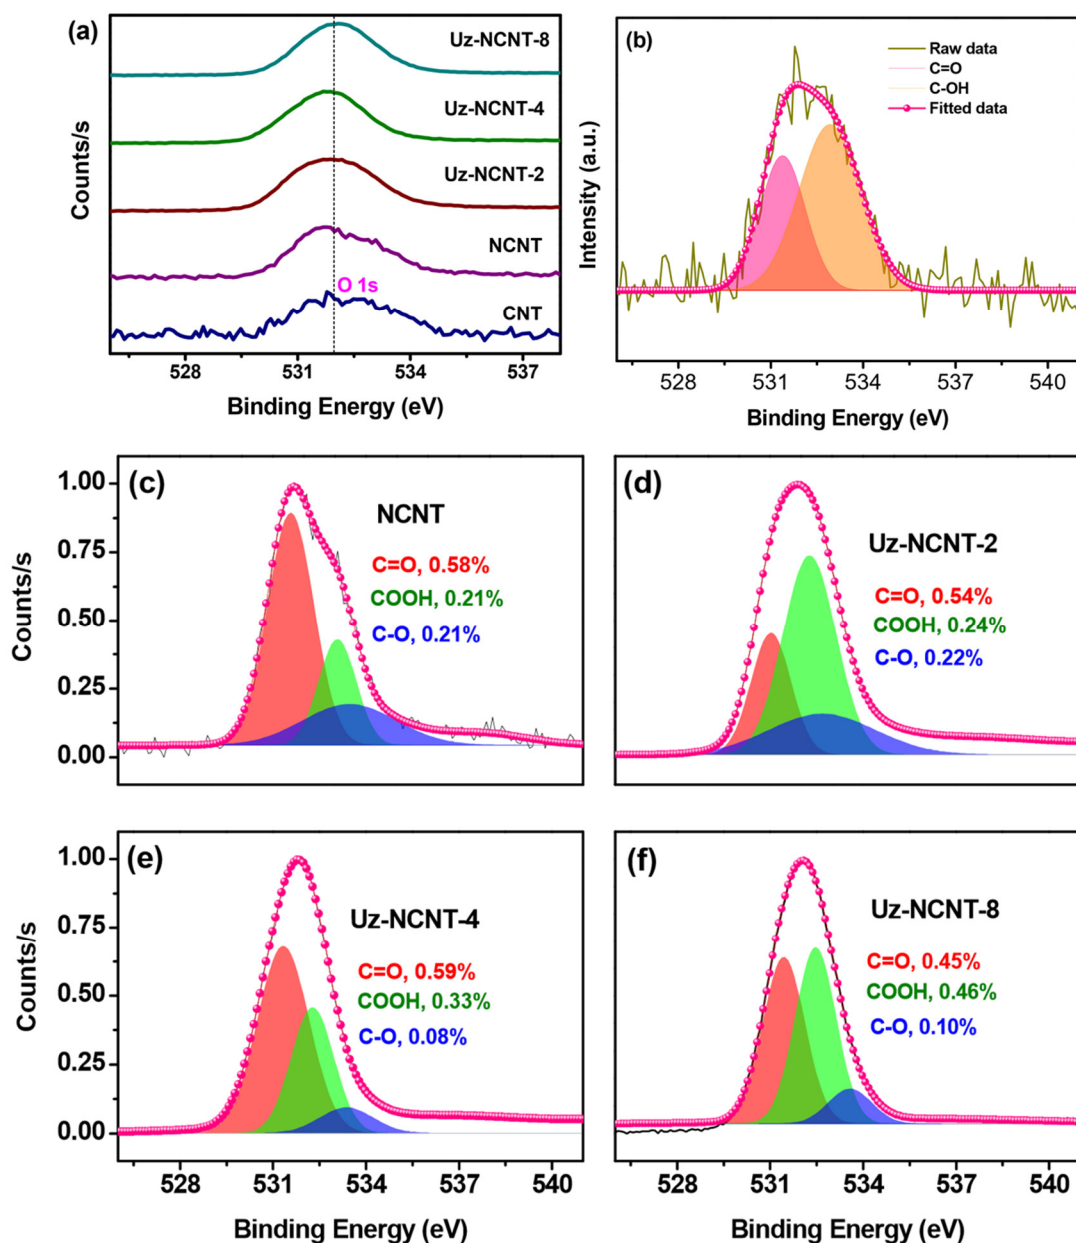

**Figure S5.** (a) C 1s spectra, and deconvoluted O 1s core-level spectra of (b) NCNT, (c) Uz-NCNT-2, (d) Uz-NCNT-4 and (e) Uz-NCNT-8 and (f) Uz-NCNT-8.

**Table S5.** Atomic percentage of oxygen containing functional groups in carbocatalysts was determined from O 1s spectra.

| O-groups   | Area | Center | Width | Height | Fraction (%) |
|------------|------|--------|-------|--------|--------------|
| CNT        |      |        |       |        |              |
| C-O        | 1.47 | 532.92 | 2.03  | 0.58   | 0.63         |
| C=O        | 0.88 | 531.38 | 1.49  | 0.47   | 0.37         |
| Total area | 2.35 |        |       |        | 1.00         |
| NCNT       |      |        |       |        |              |
| C-O        | 0.57 | 533.65 | 3.04  | 0.15   | 0.21         |
| C=O        | 1.60 | 531.57 | 1.50  | 0.85   | 0.58         |
| COOH       | 0.59 | 533.71 | 1.22  | 0.39   | 0.21         |
| Total area | 2.76 |        |       |        | 1.00         |
| Uz-NCNT-2  |      |        |       |        |              |

|            |       |        |      |      |       |
|------------|-------|--------|------|------|-------|
| C-O        | 0.65  | 533.08 | 3.46 | 0.15 | 0.22  |
| C=O        | 1.58  | 532.57 | 1.72 | 0.73 | 0.54  |
| COOH       | 0.72  | 531.53 | 1.29 | 0.45 | 0.24  |
| Total area | 2.95  |        |      |      | 1.00  |
| Uz-NCNT-4  |       |        |      |      |       |
| C-O        | 0.21  | 533.57 | 1.75 | 0.09 | 0.08  |
| C=O        | 1.43  | 531.43 | 1.68 | 0.68 | 0.59  |
| COOH       | 0.79  | 532.47 | 1.38 | 0.46 | 0.33  |
| Total area | 2.43  |        |      |      | 1.00  |
| Uz-NCNT-8  |       |        |      |      |       |
| C-O        | 0.23  | 533.58 | 1.42 | 0.13 | 0.10  |
| C=O        | 1.04  | 531.54 | 1.37 | 0.61 | 0.45  |
| COOH       | 1.07  | 532.47 | 1.33 | 0.64 | 0.46  |
| Total area | 2.338 |        |      |      | 1.000 |

**Table S6.** Summary of key active sites in carbocatalyst/PMS activation for ACP degradation.

| Structure-activity                   | Active N-groups | Correlation Co-efficient (R <sup>2</sup> ) | Active O-groups | Correlation Co-efficient (R <sup>2</sup> ) |
|--------------------------------------|-----------------|--------------------------------------------|-----------------|--------------------------------------------|
| <i>Structure—k<sub>1</sub> (ACP)</i> | Pyridinic N     | 0.9219                                     | -C=O            | 0.9699                                     |
|                                      | Graphitic N     | 0.8891                                     | -C-O            | 0.9364<br>(downtrend)                      |
| <i>Structure—k<sub>1</sub> (PMS)</i> | Graphitic N     | 0.7014                                     | -C=O            | 0.9775                                     |



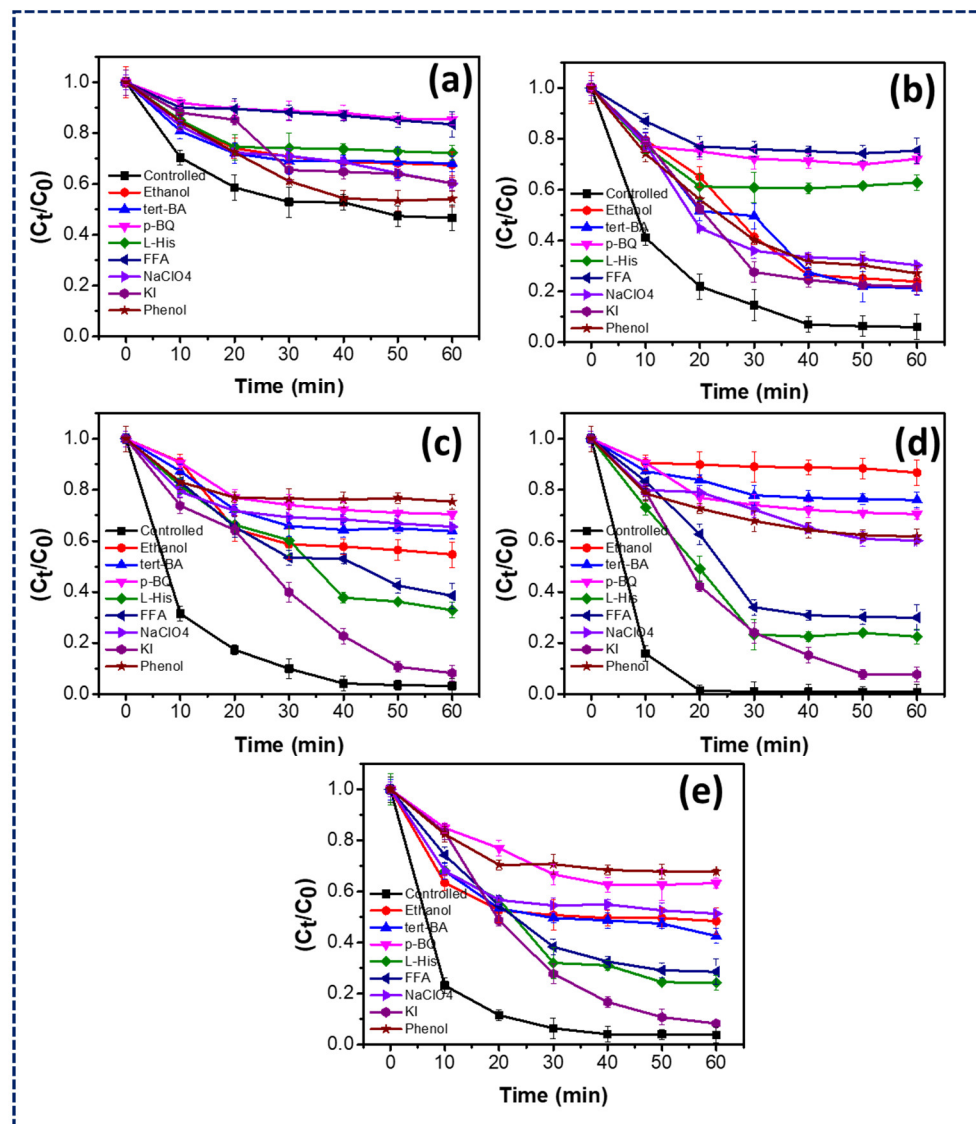

**Figure S6.** (a) Effect of various chemical quenchers on normalized ACP concentration at (a) CNT/PMS, (b) NCNT/PMS, (c) Uz-NCNT-2/PMS, (d) Uz-NCNT-4/PMS and (e) Uz-NCNT-8/PMS systems. Quenching studies were performed with  $C_{ACP} = 10 \text{ mg L}^{-1}$ ,  $C_{Catalyst} = 100 \text{ mg L}^{-1}$ ,  $C_{PMS} = 0.5 \text{ mM}$ ,  $C_{Ethanol}$  or  $C_{tert-BA} = C_{p-BQ} = 500 \text{ mM}$  or  $C_{FFA} = C_{L-His} = C_{NaClO4} = C_{phenol} = C_{KI} = 50 \text{ mM}$ .

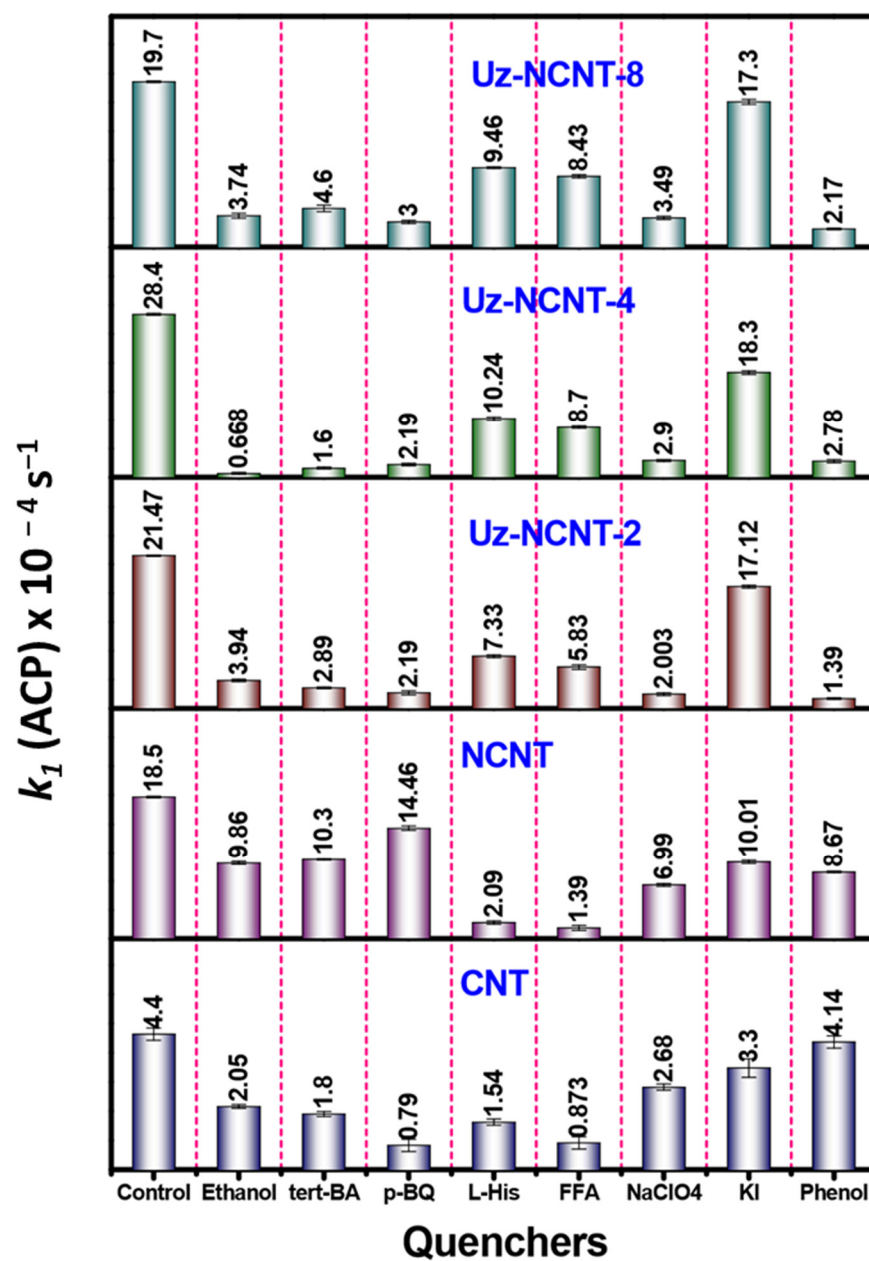

**Figure S7.** Impact of chemical scavengers on  $k_1$  (ACP) under different catalytic systems. Quenching studies were carried out at  $C_{ACP} = 10 \text{ mg L}^{-1}$ ,  $C_{Catalyst} = 100 \text{ mg L}^{-1}$ ,  $C_{PMS} = 0.5 \text{ mM}$ ,  $C_{Ethanol}$  or  $C_{tert-BA} = C_{p-BQ} = 500 \text{ mM}$  or  $C_{FFA} = C_{L-His} = C_{NaClO4} = C_{phenol} = C_{KI} = 50 \text{ mM}$ .

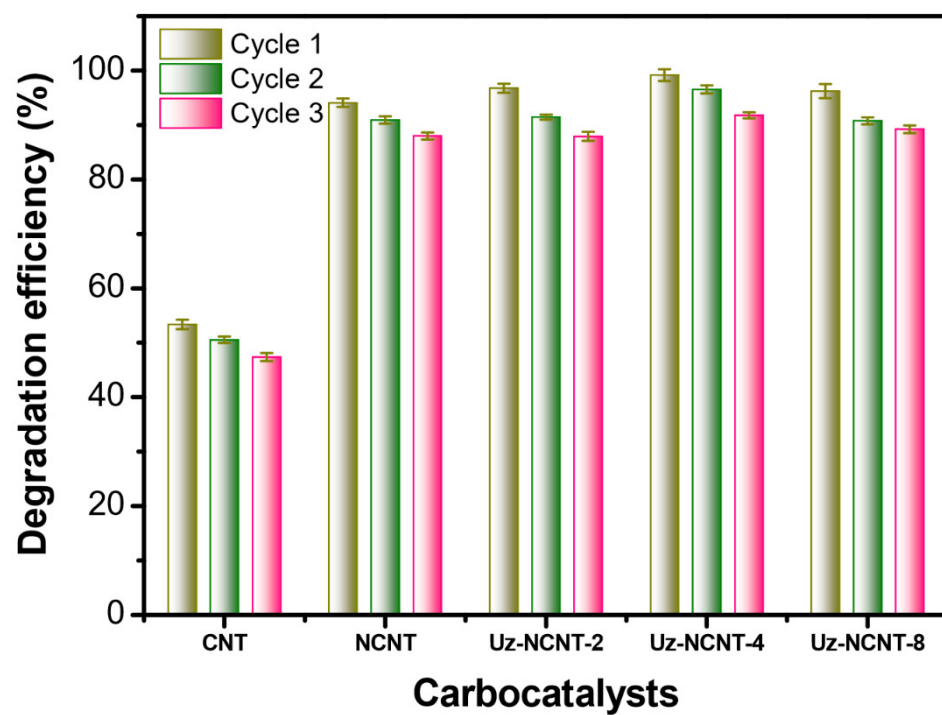

**Figure S8.** ACP degradation efficiency by reusability test in three consecutive runs. Experimental conditions  $C_{ACP} = 10 \text{ mg L}^{-1}$ ,  $C_{Catalyst} = 100 \text{ mg L}^{-1}$ ,  $C_{PMS} = 0.5 \text{ mM}$  and  $pH_0 = 7 \pm 0.3$ .
